# Supplementary material
Source: PubMed Central journal article supplement (PMC5837669)
Supplement: brain-2017-01182-file008_awx300.pdf [file brain-2017-01182-file008_awx300.pdf]

12  
13  
14  
15  
16  
17  
18  
19  
20  
21  
22  
23  
24  
25  
26  
27  
28  
29  
30  
31  
32  
33  
34  
35  
36  
37

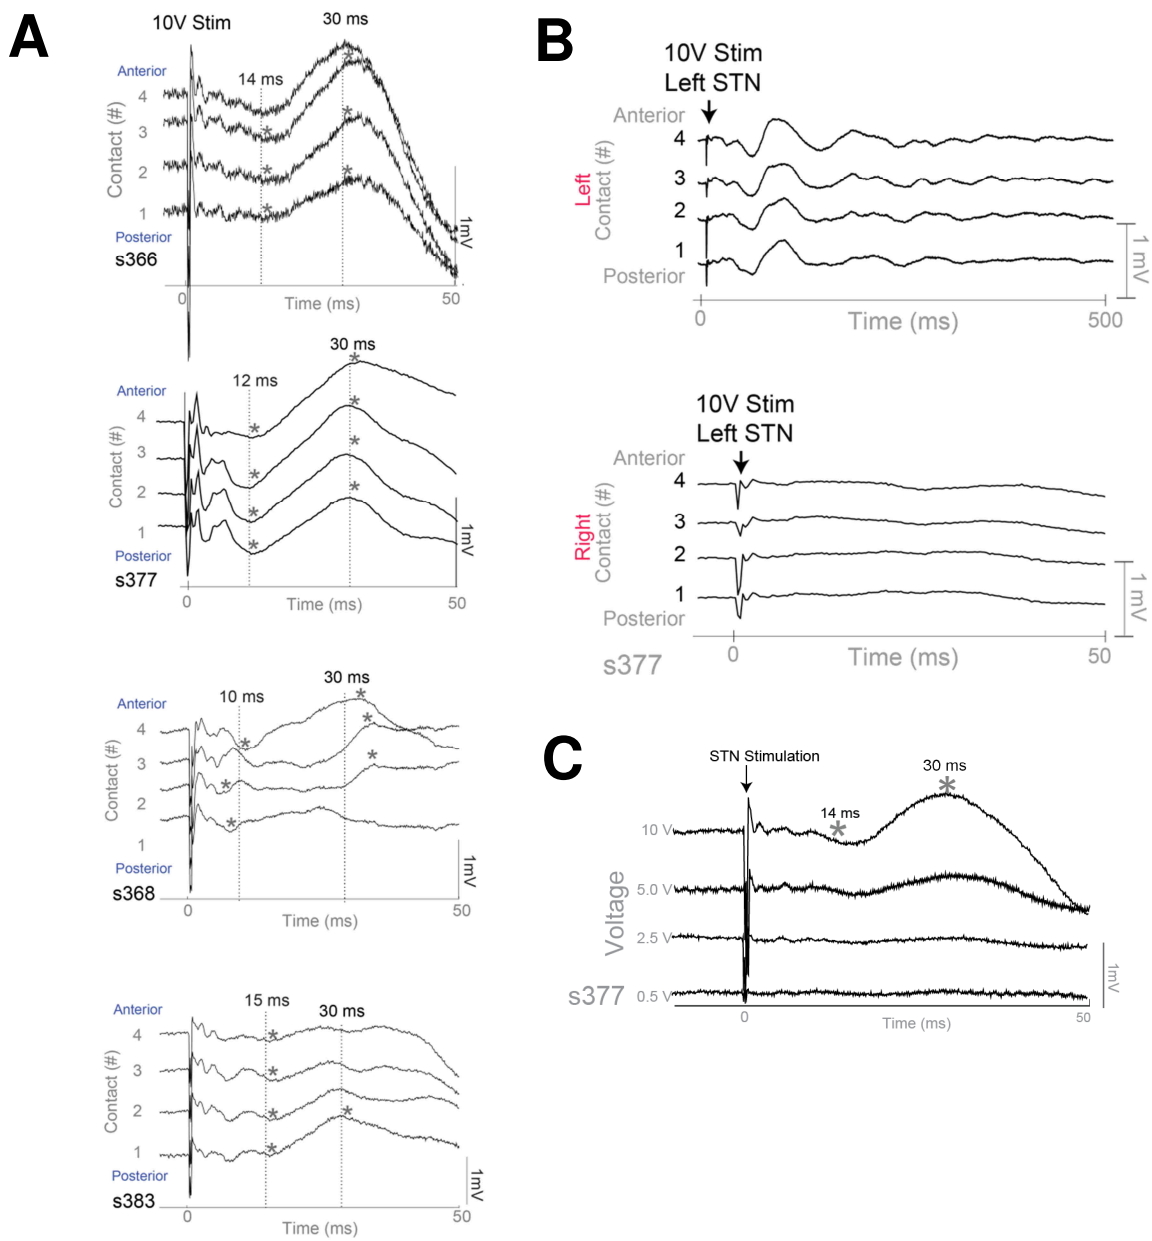

**Supplementary Fig. 2. ESTT results from additional patients. Related to Fig. 1.** A) Every ESTT subject with 10V STN stimulation had significant evoked potentials at ipsilateral IPFC consistent with monosynaptic propagation along the hyperdirect pathway (\* = statistically significant with FDR correction; see also Supplementary Table 1). B) ESTT recordings in ipsilateral and contralateral IPFC and M1 after L STN stimulation. Top traces; longer 500-ms window of IPFC and M1 recording after L STN stimulation. Bottom traces: no N1/P1 peaks were seen contralateral to L STN stimulation. C) Ipsilateral ESTT recordings as a function of STN voltage. Recording from 1 contact in IPFC with varying STN stimulation voltage.
