# Supplementary material
Source: PubMed Central journal article supplement (PMC5837669)
Supplement: brain-2017-01182-file009_awx300.pdf [file brain-2017-01182-file009_awx300.pdf]

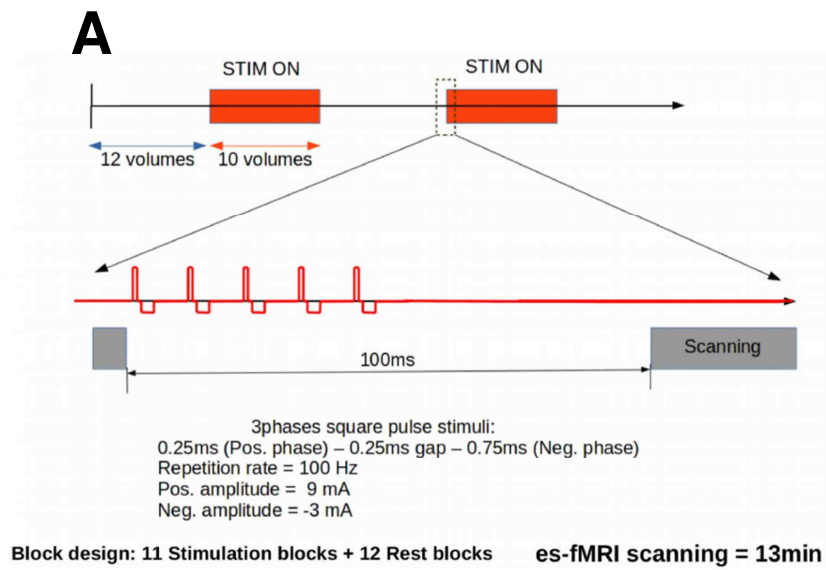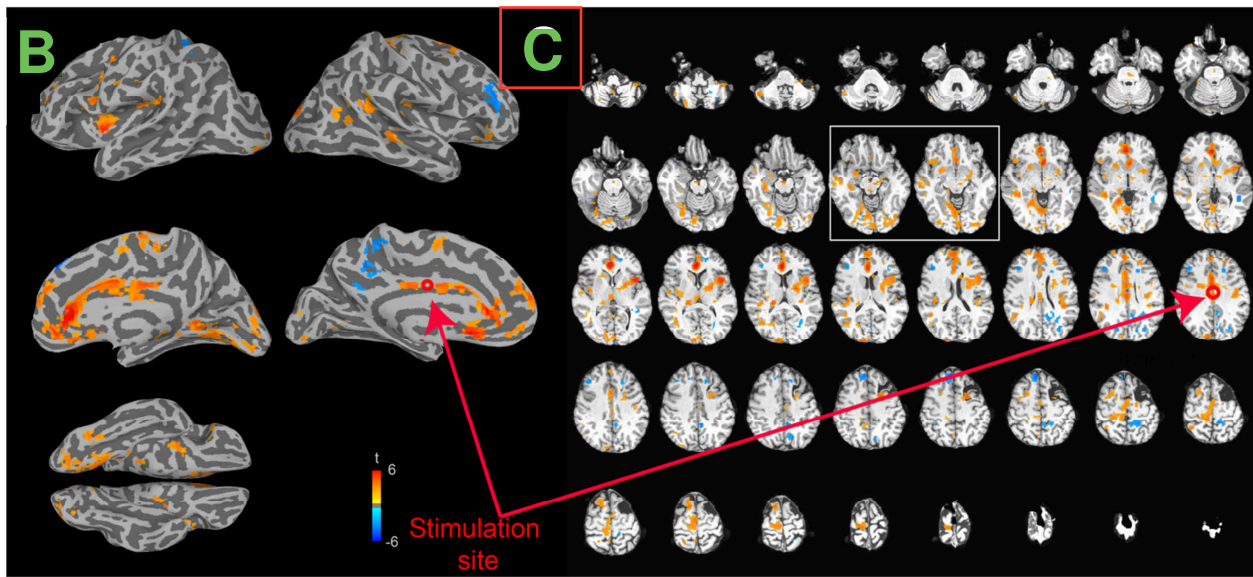

38

39 **Supplementary Fig. 3. Left mid-cingulate (mPFC) es-fMRI Stimulation. Related to Fig. 2.** A) Stimulation  
 40 parameters. B-C) Full FDR-corrected es-fMRI BOLD signal maps in Fig 2A-C; red are areas of activation,  
 41 blue are areas of deactivation rendered on an inflated brain and on brain slices. Mid-cingulate stimulation site  
 42 indicated in red. White box encapsulates two slices with STN regions, showing L STN response to L mPFC  
 43 stimulation.
