# Supplementary material
Source: PubMed Central journal article supplement (PMC5837669)
Supplement: brain-2017-01182-file011_awx300.pdf [file brain-2017-01182-file011_awx300.pdf]

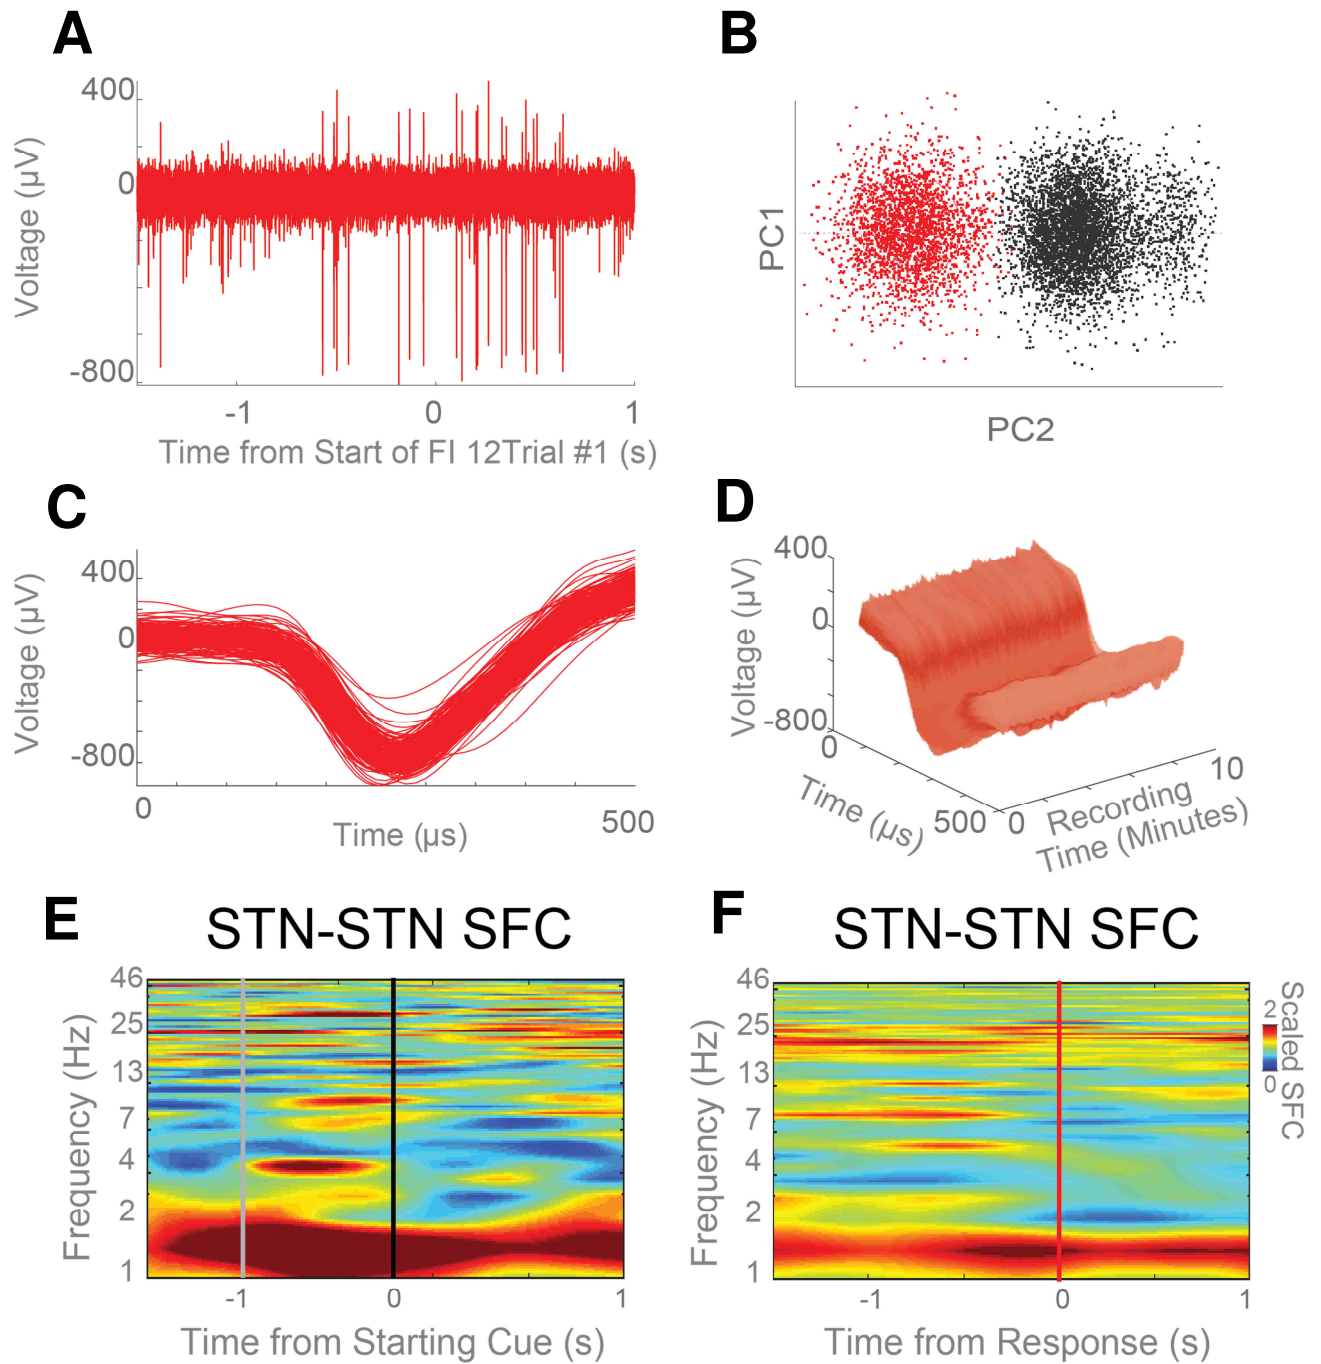

69

70

71

72

73

74

75 **Supplementary Fig. 5. STN intraoperative human neuronal recordings. Related to Fig. 4.** A) Raw voltage  
 76 record at 24 kHz filtered for spikes from a single STN channel in a single patient around a single FI12 trial. B) STN  
 77 neurons had consistent waveforms and were well-separated in PCA space. C-D) Waveforms were stable over the  
 78 entire 10-minute intraoperative recording session. E) Spike-field coherence with STN LFPs for cue-modulated and  
 79 (F) response-modulated STN neurons.
