# Supplementary material
Source: PubMed Central journal article supplement (PMC5837669)
Supplement: brain-2017-01182-file013_awx300.pdf [file brain-2017-01182-file013_awx300.pdf]

## Midfrontal EEG (AFz)

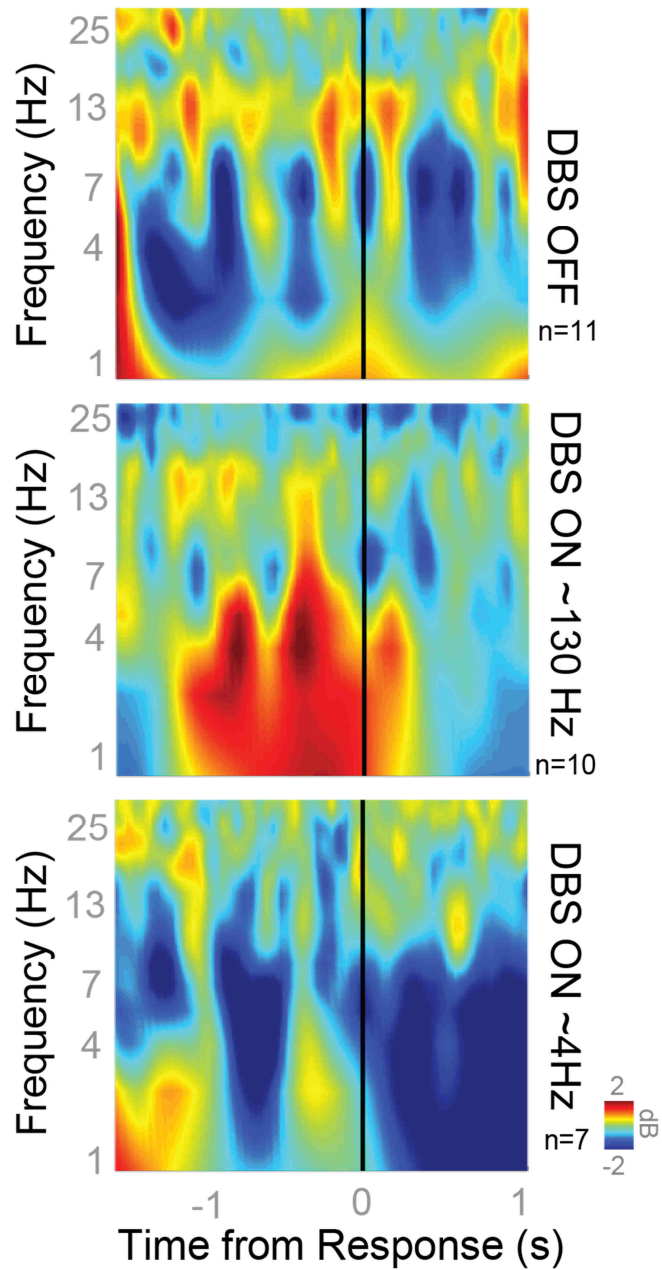

86

87

88 **Supplementary Fig. 7. Midfrontal EEG activity around response with DBS OFF, HF-DBS, and 4-Hz STN-**

89 **DBS. Related to Fig. 6. 4-Hz STN-DBS did not change delta/theta activity around responses compared to DBS**  
OFF.
