# Supplementary material
Source: PubMed Central journal article supplement (PMC5837669)
Supplement: brain-2017-01182-file014_awx300.pdf [file brain-2017-01182-file014_awx300.pdf]

| <b>Comparison</b>                  | <b>Test statistic</b> | <b>Value</b> | <b>DF</b> | <b>p-value</b>        | <b>Power</b> | <b>Fig</b> |
|------------------------------------|-----------------------|--------------|-----------|-----------------------|--------------|------------|
| <b>ESTT Group Ch1: P1 10V</b>      | FDR t                 | 7.7          | 319       | $2 \times 10^{-13}$   | 1            | 1C         |
| <b>ESTT Group Ch2: P1 10V</b>      | FDR t                 | 8.5          | 319       | $6 \times 10^{-16}$   | 1            | 1C         |
| <b>ESTT Group Ch3: P1 10V</b>      | FDR t                 | 10.4         | 319       | $6 \times 10^{-22}$   | 1            | 1C         |
| <b>ESTT Group Ch4: P1 10V</b>      | FDR t                 | 10.6         | 319       | $1 \times 10^{-22}$   | 1            | 1C         |
| <b>ESTT Group Ch2: P1 5V</b>       | FDR t                 | 1.1          | 319       | 0.0065                | 0.78         | 1C         |
| <b>ESTT Group Ch3: P1 5V</b>       | FDR t                 | 2.7          | 319       | 0.0045                | 0.81         | 1C         |
| <b>ESTT Group Ch1: N1 10V</b>      | FDR t                 | 9.4          | 319       | $8.5 \times 10^{-19}$ | 1            | 1C         |
| <b>ESTT Group Ch2: N1 10V</b>      | FDR t                 | 6.5          | 319       | $2.7 \times 10^{-10}$ | 1            | 1C         |
| <b>ESTT Group Ch3: N1 10V</b>      | FDR t                 | 9.4          | 319       | $8.6 \times 10^{-19}$ | 1            | 1C         |
| <b>ESTT Group Ch4: N1 10V</b>      | FDR t                 | 7.9          | 319       | $4.5 \times 10^{-14}$ | 1            | 1C         |
| <b>ESTT Group Ch1: N1 5V</b>       | FDR t                 | 6.0          | 319       | $5.2 \times 10^{-9}$  | 1            | 1C         |
| <b>ESTT Group Ch2: N1 5V</b>       | FDR t                 | 5.1          | 319       | $6.4 \times 10^{-7}$  | 1            | 1C         |
| <b>ESTT Group Ch3: N1 5V</b>       | FDR t                 | 3.8          | 319       | 0.00014               | 0.97         | 1C         |
| <b>ESTT Group Ch4: N1 5V</b>       | FDR t                 | 5.3          | 319       | $2.3 \times 10^{-7}$  | 1            | 1C         |
| <b>STN BOLD stim vs. non-stim</b>  | FDR t                 | 4.0          | 241       | 0.00009               | 1            | 2C         |
| <b>STN BOLD stim vs. non-stim</b>  | FDR t                 | 3.2          | 186       | 0.0015                | 1            | S3         |
| <b>RT: FI3 vs. FI12</b>            | t                     | 5.9          | 10        | 0.0004                | 1            | S4         |
| <b>RT:F12 OR vs. Fig 4 DBS ON</b>  | Bayes                 | 1.12         | 10        | >0.5                  |              | S4         |
| <b>Granger: 20 Hz vs. shuffle</b>  | paired t              | 2.8          | 12        | 0.02                  | 1            | 3G         |
| <b>Granger MFC vs. STN 20 Hz</b>   | paired t              | 2            | 12        | 0.08                  | 0.91         | 3G         |
| <b>Granger: 4 Hz vs. shuffle</b>   | paired t              | 3            | 12        | 0.002                 | 1            | 3G         |
| <b>Granger MFC vs. STN 4 Hz</b>    | paired t              | 2.4          | 12        | 0.04                  | 0.91         | 3G         |
| <b>RT vs. Firing Rate</b>          | t                     | 3            | 20        | 0.006                 | 0.83         | S6         |
| <b>Spike-field coherence: 4 Hz</b> | t                     | 2.1          | 34        | 0.04                  | 0.98         | 4C         |
| <b>Linear Mixed-Effects Model:</b> | t                     | 3.4          | 1026      | 0.006                 | 1.0          | 5F         |

| <b>Midfrontal power ~ DBS</b>      |                | <b>7</b> |      |                       |     |    |
|------------------------------------|----------------|----------|------|-----------------------|-----|----|
| <b>Linear Mixed-Effects Model:</b> | Interval       | 11.4     | 1023 | $10^{-27}$            | 1.0 | 5H |
| <b>RT~STN-DBS*Interval Length</b>  |                |          |      |                       |     |    |
|                                    | DBS            | 2.1      | 1023 | 0.04                  |     |    |
|                                    | Interval x DBS | 2.9      | 1023 | 0.004                 |     |    |
| <b>s366 ESTT 10V Ch1: N1</b>       | FDR t          | 3.8      | 39   | 0.0004                |     | S2 |
| <b>s366 ESTT 10V Ch2: N1</b>       | FDR t          | 3.0      | 39   | 0.004                 |     | S2 |
| <b>s366 ESTT 10V Ch3: N1</b>       | FDR t          | 4.4      | 39   | 0.0001                |     | S2 |
| <b>s366 ESTT 10V Ch1: P1</b>       | FDR t          | 7.1      | 39   | $1.7 \times 10^{-7}$  |     | S2 |
| <b>s366 ESTT 10V Ch2: P1</b>       | FDR t          | 9.2      | 39   | $2.8 \times 10^{-11}$ |     | S2 |
| <b>s366 ESTT 10V Ch3: P1</b>       | FDR t          | 3.2      | 39   | 0.0027                |     | S2 |
| <b>s367 ESTT 10V Ch3: P1</b>       | FDR t          | 4.6      | 39   | $3.9 \times 10^{-5}$  |     | 1B |
| <b>s367 ESTT 10V Ch4: P1</b>       | FDR t          | 13.4     | 39   | $3.4 \times 10^{-16}$ |     | 1B |
| <b>s367 ESTT 10V Ch1: N1</b>       | FDR t          | 3.4      | 39   | 0.0016                |     | 1B |
| <b>s367 ESTT 10V Ch3: N1</b>       | FDR t          | 4.5      | 39   | 0.0001                |     | 1B |
| <b>s367 ESTT 10V Ch4: N1</b>       | FDR t          | 3.3      | 39   | 0.0023                |     | 1B |
| <b>s368 ESTT 10V Ch1: P1</b>       | FDR t          | 6.4      | 79   | $1.1 \times 10^{-8}$  |     | S2 |
| <b>s368 ESTT 10V Ch2: P1</b>       | FDR t          | 6.3      | 79   | $1.8 \times 10^{-8}$  |     | S2 |
| <b>s368 ESTT 10V Ch3: P1</b>       | FDR t          | 4.2      | 79   | $6.5 \times 10^{-5}$  |     | S2 |
| <b>s368 ESTT 10V Ch1: N1</b>       | FDR t          | 13.4     | 79   | $1.2 \times 10^{-6}$  |     | S2 |
| <b>s368 ESTT 10V Ch2: N1</b>       | FDR t          | 13.4     | 79   | 0.012                 |     | S2 |

|                              |       |      |    |                       |    |
|------------------------------|-------|------|----|-----------------------|----|
| <b>s368 ESTT 10V Ch4: N1</b> | FDR t | 13.4 | 79 | $1.0 \times 10^{-4}$  | S2 |
| <b>s377 ESTT 10V Ch1: P1</b> | FDR t | 11.6 | 79 | $1.9 \times 10^{-18}$ | S2 |
| <b>s377 ESTT 10V Ch2: P1</b> | FDR t | 18.8 | 79 | $6.9 \times 10^{-31}$ | S2 |
| <b>s377 ESTT 10V Ch3: P1</b> | FDR t | 25.1 | 79 | $2.1 \times 10^{-39}$ | S2 |
| <b>s377 ESTT 10V Ch4: P1</b> | FDR t | 24.9 | 79 | $4.3 \times 10^{-39}$ | S2 |
| <b>s377 ESTT 10V Ch1: N1</b> | FDR t | 11.1 | 79 | $8.9 \times 10^{-18}$ | S2 |
| <b>s377 ESTT 10V Ch2: N1</b> | FDR t | 13.8 | 79 | $8.3 \times 10^{-23}$ | S2 |
| <b>s377 ESTT 10V Ch3: N1</b> | FDR t | 15.8 | 79 | $4.2 \times 10^{-26}$ | S2 |
| <b>s377 ESTT 10V Ch4: N1</b> | FDR t | 12.0 | 79 | $1.7 \times 10^{-19}$ | S2 |
| <b>s383 ESTT 10V Ch1: P1</b> | FDR t | 3.5  | 79 | 0.0008                | S2 |
| <b>s383 ESTT 10V Ch1: N1</b> | FDR t | 3.0  | 79 | 0.0039                | S2 |
| <b>s383 ESTT 10V Ch2: N1</b> | FDR t | 2.7  | 79 | 0.0085                | S2 |
| <b>s383 ESTT 10V Ch3: N1</b> | FDR t | 4.6  | 79 | $1.5 \times 10^{-5}$  | S2 |
| <b>s383 ESTT 10V Ch4: N1</b> | FDR t | 3.3  | 79 | 0.0017                | S2 |

91

92

93

94 **Supplementary Table 2: ESTT, es-fMRI, and ECoG demographics**

| Experiment | Patient ID | Age | Gender | Clinical indication |
|------------|------------|-----|--------|---------------------|
| ESTT 1     | 366        | 55  | M      | PD                  |
| ESTT 2     | 367        | 67  | M      | PD                  |
| ESTT 3     | 368        | 39  | M      | PD                  |
| ESTT 4     | 377        | 62  | M      | PD                  |
| ESTT 5     | 383        | 51  | M      | PD                  |
| es-fMRI    | 292        | 53  | F      | Epilepsy            |
| es-fMRI    | 314        | 33  | F      | Epilepsy            |
| ECoG       | 322        | 29  | F      | Epilepsy            |

95

96 **Supplementary Table 3: Human STN intraoperative demographics**

| Patient ID | Age | Diagnosis | Gender | STN Side |
|------------|-----|-----------|--------|----------|
| 291        | 50  | PD        | F      | R & L    |
| 297        | 69  | PD        | F      | L        |
| 304        | 72  | PD        | M      | L        |
| 306        | 62  | PD        | M      | L        |
| 309        | 62  | PD        | F      | L        |
| 312        | 55  | PD        | M      | L        |
| 313        | 64  | PD        | F      | L        |
| 317        | 65  | PD        | M      | L        |
| 326        | 57  | PD        | M      | L        |
| 349        | 61  | PD        | M      | R & L    |

97

98

99 **Supplementary Table 4: STN-DBS EEG demographics**

| Patient ID | Age/gender | Medications                                                                                                                                                  | Levodopa equivalent dose | Left treatment setting (contact #, voltage, pulse width/Hz) | Right treatment setting (contact #, voltage, pulse width, Hz) | UPDRS (OFF/ON) | VHI |
|------------|------------|--------------------------------------------------------------------------------------------------------------------------------------------------------------|--------------------------|-------------------------------------------------------------|---------------------------------------------------------------|----------------|-----|
| ST01       | 59/F       | (1) Amantadine 100 mg bid<br>(2) Comtan 200 mg qid<br>(3) Sinemet 50-200 mg x11/d                                                                            | 1650                     | Case + 2-, 1, 60/130                                        | Case + 10-, 1, 60/130                                         | 43/26          | 60  |
| ST02       | 62/M       | (1) Xanax 1 mg prn                                                                                                                                           | 0                        | Case + (1,2)-, 3.5, 60/150                                  | Case + (9,10)-, 3.8, 70/150                                   | 31/19          | 83  |
| ST03       | 66/M       | (1) Amantadine 100 mg tid<br>(2) Klonopin 0.5 mg qhs<br>(3) Requip 2 mg tid<br>(4) Requip 5 mg qid<br>(5) Rytary 48.75-195 mg x13/d<br>(6) Xanax 0.25 mg tid | 2341                     | Case + 8-, 1.6, 60/135                                      | Case + 9-, 1.5, 60/135                                        | 23/7           | 52  |
| ST04       | 76/M       | (1) Namenda 28 mg qd<br>(2) Sinemet 25-100 mg half qid                                                                                                       | 200                      | Case + 2-, 1.1, 60/120                                      | Case + 10-, 1.1, 60/135                                       | 27/24          | 68  |
| ST05       | 61/F       | (1) Amantadine 100 mg bid<br>(2) Azilect 1 mg qd<br>(3) Requip 8 mg qd<br>(4) Sinemet 50-200 mg tid                                                          | 1260                     | Case + 1-, 1.7, 60/135                                      | (8,10)+ 9-, 2.2, 60/135                                       | 9/3            | 15  |
| ST06       | 51/F       | (1) Klonopin 1 mg bid<br>(2) Sinemet 25-100 mg x9/d                                                                                                          | 900                      | Case + 2-, 2.2, 120/130                                     | Case + 10-, 2.7, 140/130                                      | 31/11          | 32  |
| ST07       | 68/M       | (1) Parcopa 25-100 mg prn<br>(2) Rytary 23.75-95 mg x8/d                                                                                                     | 656                      | 3+ 2-, 3.6, 140/130                                         | 3+ 2-, 3.5, 100/130                                           | 8/2            | 30  |
| ST08       | 64/M       | (1) Amantadine 100 mg qd<br>(2) Klonopin 0.5 mg half tid<br>(3) Stalevo 18.75-75-200 mg x5/d                                                                 | 665                      | Case + 8-, 3.7, 120/130                                     | Case + 0-, 3.6, 120/130                                       | 34/24          | 68  |
| ST09       | 72/M       | (1) Amantadine 100 mg bid<br>(2) Sinemet 25-100 mg x6/d                                                                                                      | 700                      | Case + 3-, 2.7, 60/130                                      | Case + 8-, 3.5, 90/130                                        | 21/8           | 41  |
| ST10       | 69/F       | (1) Sinemet 25-100 bid<br>(2) Xanax 0.5 mg prn                                                                                                               | 200                      | Case + 0-, 2.5, 60/130                                      | Case + 10-, 2.5, 60/130                                       | 21/16          | 25  |

100

**Supplementary Table 5: Linear mixed-effects model**

| <b>RESPONSE TIME (SEC)</b> |             |      |         |          |                           |             |
|----------------------------|-------------|------|---------|----------|---------------------------|-------------|
| <b>Fixed effect</b>        |             |      |         |          | Confidence interval (95%) |             |
| Name                       | Estimate    | SE   | t-value | p-value  | Lower limit               | Upper limit |
| (Intercept)                | 8.95        | 1.28 | 6.99    | 0.00     | 6.44                      | 11.46       |
| Midfrontal EEG*            | 0.38        | 0.17 | 2.25    | 0.02     | 0.05                      | 0.72        |
| DBS**                      | 0.01        | 0.00 | 8.33    | 1.50E-16 | 0.01                      | 0.01        |
| <b>Random effect</b>       |             |      |         |          |                           |             |
| Group                      | Name        | std  |         |          | Lower limit               | Upper limit |
| Subject                    | (Intercept) | 4.03 |         |          | 2.59                      | 6.26        |
| Error                      |             | 3.70 |         |          | 3.59                      | 3.82        |

\*1-4Hz midfrontal EEG power at 300-500ms (n=1956 trials)

\*\*ON; OFF; ON\_4HZ
